## Trajectories of Cardiac Allograft Vasculopathy After Heart Transplantation and association with mortality: a population-based study

G. Bonnet<sup>1</sup>, G. Coutance<sup>2</sup>, J. Van Keer<sup>3</sup>, M. Raynaud<sup>1</sup>, O. Aubert<sup>1</sup>, M.C. Bories<sup>4</sup>, P. Bruneval<sup>4</sup>, S. Varnous<sup>2</sup>, P. Leprince<sup>2</sup>, J.P. Empana<sup>1</sup>, M. Naesens<sup>3</sup>, J.K. Patel<sup>5</sup>, A. Loupy<sup>1</sup>, J. Kobashigawa<sup>5</sup>, X. Jouven<sup>1</sup>

<sup>1</sup>Paris Cardiovascular Research Center (PARCC), Paris Transplant Group, Paris, France; <sup>2</sup>Hospital Pitie-Salpetriere, Paris, France; <sup>3</sup>KU Leuven, Leuven, Belgium; <sup>4</sup>Hopital Europeen Georges Pompidou - University Paris Descartes, Paris, France; <sup>5</sup>Cedars-Sinai Medical Center, Los Angeles, United States of America

**Funding Acknowledgement:** Type of funding source: None

**Background:** Cardiac allograft vasculopathy (CAV) is a major contributor of heart transplant recipient's mortality. However, the associations between CAV trajectories and mortality remains poorly described.

**Purpose:** We aimed to identify the different evolutive profiles of CAV and to determine the respective association with all-cause mortality.

**Methods:** Heart transplant recipients receiving care at 4 academic centers were included. Patients underwent prospective, protocol-based monitoring consisting of repeated coronary angiographies together with systematic assessment of clinical, functional, histological and immunological parameters. The main outcome was a prediction for CAV trajectories using unsupervised latent class mixed models. We then identified their association with all-cause mortality (NCT04117152).

**Results:** Overall, 1,301 patients were included (815 and 486 in the development and validation cohorts, respectively). The median follow-up post-transplant was 6.6 years (IQR=4.7) with 4,710 coronary angiographies analyzed (3.6±1.6 CAV assessments per patient). We identified 4 distinct profiles of CAV trajectories over 10 years that were characterized by i) Patients

without CAV at baseline and non-progression (n=823, 63.3%), ii) patients without CAV at baseline and late onset CAV progression (n=79, 6.1%), iii) patients with mild baseline CAV and mild progression (n=261, 20.1%), iv) patients with mild baseline CAV and accelerated CAV progression (n=138, 10.6%, discrimination 0.95). The 4 CAV trajectories showed gradient for all-cause mortality ( $p < 0.001$ ). Trajectories #3 and #4 were associated with higher mortality rates (10-year patient survival of 73.43% [95% CI 65.18–80.02] and 51.89% [95% CI 38.76–63.51], respectively) as compared with trajectories #1, and #2 that were characterized by 10-year patient survival of 80.01 [95% CI 76.38–84.82] and 83.49% [95% CI 71.34–90.80], respectively ( $p < 0.001$ ).

**Conclusion:** In a large multicentric and highly phenotyped prospective cohort of heart transplant recipients, we identified 4 robust CAV trajectories. These different profiles were associated with distinct prognosis. Our results provide the basis for a trajectory-based assessment of heart transplant patients for early patient risk stratification and patient monitoring.

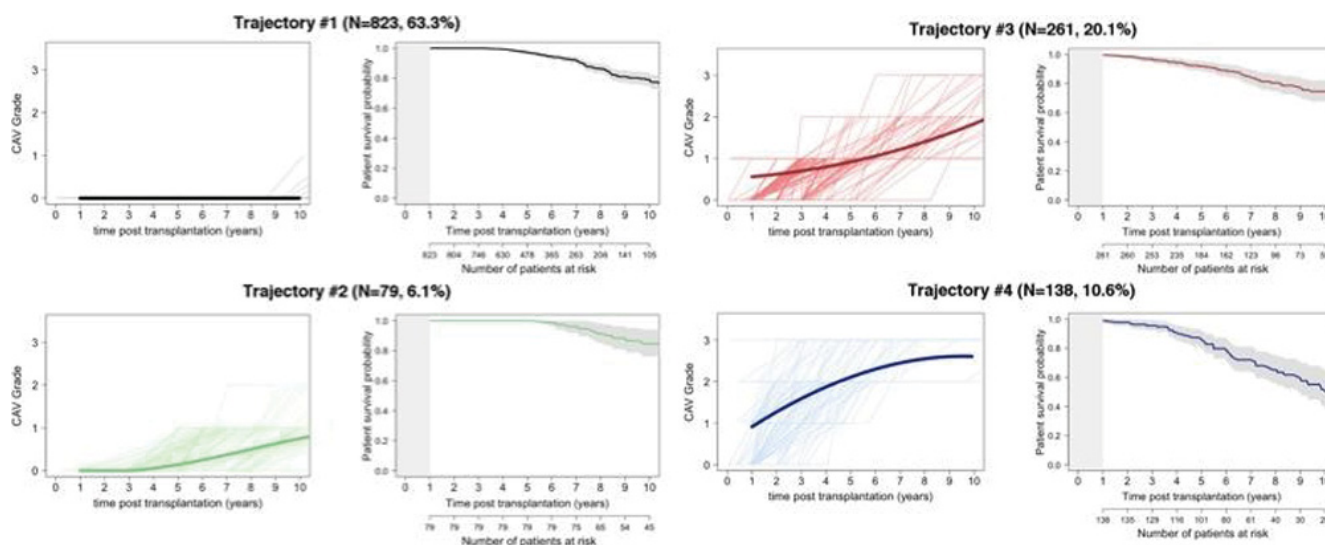

Figure 1. Overall 10-year survival probability according to the CAV trajectory in the overall cohort (n=1,301). The left part represents the main profiles CAV grades identified with latent class mixed models. Thick lines represent latent class trajectory; thin lines represent CAV individual patient trajectory. The right part represent the Kaplan Meier curves of the different trajectories.
